# Supplementary material for: H. pylori Eradication Treatment Alters Gut Microbiota and GLP-1 Secretion in Humans
Source: PubMed Central journal article supplement (PMC6517938; doi:10.3390/jcm8040451), 2019-04-04

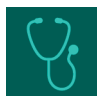

SUPPLEMENTARY TABLES:

Table S1. Simple linear correlation: microbial community and GLP-1 levels: Control group

| PHYLA                 | FAMILY/GENUS/<br>SPECIES | GLP-1<br>baseline        | GLP-1 30'                   | GLP-1 60'                   | GLP-1<br>120'               | AUC<br>GLP-1                |
|-----------------------|--------------------------|--------------------------|-----------------------------|-----------------------------|-----------------------------|-----------------------------|
| <i>Actinobacteria</i> | <i>Micrococcaceae</i>    | $r=0.515^*$<br>$p=0.020$ | NS                          | NS                          | NS                          | NS                          |
|                       | <i>Rothia</i>            | $r=0.515^*$<br>$p=0.020$ | NS                          | NS                          | NS                          | NS                          |
| <i>Bacteroidetes</i>  | <i>Bacteroidetes</i>     | NS                       | NS                          | $r=-0.456^*$<br>$p=0.043$   | NS                          | NS                          |
|                       | <i>Bacteroidaceae</i>    | NS                       | NS                          | $r=-0.512^*$<br>$p=0.021$   | NS                          | NS                          |
|                       | <i>Bacteroides</i>       | NS                       | NS                          | $r=0.350^*$<br>$p=0.021$    | NS                          | NS                          |
| <i>Firmicutes</i>     | <i>Firmicutes</i>        | NS                       | NS                          | $r=0.457^*$<br>$p=0.043$    | NS                          | NS                          |
|                       | <i>Peptococcaceae</i>    | NS                       | $r=0.449^*$<br>$p=0.047$    | $r=0.514^*$<br>$p=0.020$    | NS                          | NS                          |
|                       | <i>Ruminococcaceae</i>   | NS                       | NS                          | $r=0.621^{**}$<br>$p=0.004$ | $r=0.475^*$<br>$p=0.034$    | $r=0.474^*$<br>$p=0.035$    |
|                       | <i>Megamonas</i>         | $r=0.509^*$<br>$p=0.022$ | $r=0.582^{**}$<br>$p=0.007$ | $r=0.580^{**}$<br>$p=0.007$ | $r=0.453^{**}$<br>$p=0.004$ | $r=0.570^{**}$<br>$p=0.009$ |
|                       | <i>Oribacterium</i>      | $r=0.460^*$<br>$p=0.041$ | NS                          | NS                          | NS                          | NS                          |

\*\* Correlation is significant at the 0.001 level; \*Correlation is significant at the 0.05 level.

Spearman correlation test was used to compare the microbial abundance respect to GLP-1 levels in control group.

Table S2. Simple linear correlation: microbial community and GLP-1: H. pylori positive (antibiotic treatment).

| PHYLA          | FAMILY/GENUS/SPECIES                | GLP-1 baseline        | GLP-1 30'             | GLP-1 60'            | GLP-1 120'           | AUC GLP-1            |
|----------------|-------------------------------------|-----------------------|-----------------------|----------------------|----------------------|----------------------|
| Actinobacteria | <i>Bifidobacterium adolescentis</i> | r=0.336*<br>p=0.034   | r=0.332*<br>p=0.037   | NS                   | NS                   | r=0.329*<br>p=0.041  |
| Bacteroidetes  | <i>Dysgonomonas</i>                 | NS                    | NS                    | r=-0.321*<br>p=0.042 | NS                   | NS                   |
| Firmicutes     | <i>Turcibacteraceae</i>             | NS                    | r=0.358*<br>p=0.023   | NS                   | NS                   | NS                   |
|                | <i>Turcibacter</i>                  | NS                    | r=0.358*<br>p=0.023   | NS                   | NS                   | NS                   |
|                | <i>Streptococcus anginosus</i>      | NS                    | NS                    | r=0.359*<br>p=0.023  | r=0.338*<br>p=0.035  | NS                   |
|                | <i>Acidaminococcus</i>              | NS                    | NS                    | NS                   | r=0.453**<br>p=0.004 | r=0.329*<br>p=0.041  |
|                | <i>Blautia producta</i>             | r=-0.439**<br>p=0.005 | r=-0.427**<br>p=0.006 | r=-0.330*<br>p=0.038 | NS                   | r=-0.387*<br>p=0.015 |
| Proteobacteria | <i>Oxalobacteraceae</i>             | NS                    | NS                    | r=0.365*<br>p=0.021  | NS                   | r=0.327*<br>p=0.042  |
|                | <i>Oxalobacter</i>                  | NS                    | NS                    | r=0.365*<br>p=0.021  | NS                   | r=0.328*<br>p=0.042  |
|                | <i>O. formigenes</i>                | NS                    | NS                    | r=0.365*<br>p=0.021  | NS                   | r=0.328*<br>p=0.042  |

\*\* Correlation is significant at the 0.001 level; \*Correlation is significant at the 0.05 level.

Spearman correlation test was used to compare the microbial abundance respect to GLP-1 levels in H. pylori-infected patients before antibiotic treatment.

Table S3. Simple linear correlation: microbial community and GLP-1: H. pylori-infected patients after antibiotic treatment.

| FILOS                 | FAMILY/GENUS/E SPECIES    | GLP-1 basal          | GLP-1 30'            | GLP-1 60'            | GLP-1 120'           | AUC GLP-1            |
|-----------------------|---------------------------|----------------------|----------------------|----------------------|----------------------|----------------------|
| <i>Actinobacteria</i> | <i>Actinobacteria</i>     | r=0,462**<br>p=0,005 | r=0,496**<br>p=0,002 | r=0,407*<br>p=0,015  | r=0,368*<br>p=0,030  | r=0,456**<br>p=0,006 |
|                       | <i>Bifidobacteriaceae</i> | r=0,343*<br>p=0,038  | NS                   | r=0,374*<br>p=0,022  | NS                   | r=0,357*<br>p=0,030  |
|                       | <i>Bifidobacterium</i>    | r=0,369*<br>p=0,029  | NS                   | NS                   | NS                   | NS                   |
|                       | <i>B. longum</i>          | r=0,442**<br>p=0,008 | r=0,414*<br>p=0,013  | r=0,434**<br>p=0,009 | r=0,391*<br>p=0,020  | r=0,450**<br>p=0,007 |
| <i>Bacteroidetes</i>  | <i>Prevotella</i>         | r=-0,396*<br>p=0,017 | NS                   | r=-0,340*<br>p=0,042 | r=-0,375*<br>p=0,024 | r=-0,369*<br>p=0,027 |
| <i>Firmicutes</i>     | <i>Ruminococcaceae</i>    | NS                   | r=0,341*<br>p=0,045  | NS                   | NS                   | NS                   |

\*\* Correlation is significant at the 0.001 level; \*Correlation is significant at the 0.05 level.

Spearman correlation test was used to compare the microbial abundance respect to GLP-1 levels in H. pylori-infected patients after antibiotic treatment.

Figure S1. Relative abundances of the OTUs found significant with the correlations between changes in GLP-1 levels at minute 60 and the AUC for GLP-1 with percentage change in microbial community after antibiotic treatment.

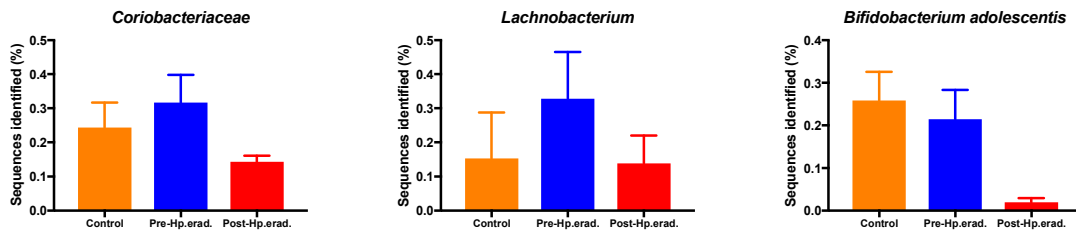

Supplement: jcm-08-00451-s001.pdf [file jcm-08-00451-s001.pdf]
